# Supplementary material
Source: publisher figshare collection journal article supplement (https://tandf.figshare.com/articles/dataset/_/3777684)
Supplement: Supplementary file 1 [file 2]

# Supplementary Material: Forecasting Generalized Quantiles of Electricity Demand: A Functional Data Approach.

October 12, 2015

## SIMULATION STUDY

In this supplement we conduct a simulation study to evaluate the performance of the proposed method for functional principal component analysis (FPCA) of generalized quantiles. We run the simulation for independent as well as for autocorrelated functional observations to demonstrate robustness to temporal dependence. We follow the simulation setup of Guo et al. (2015) and Tran et al. (2014), who both suggest alternative approaches for modeling independent functional tail event curves.

The data  $Y_{j,k}$ ,  $j = 1, \dots, T$ ,  $k = 1, \dots, N$  is simulated from the model

$$Y_{j,k} = \mu(t_j) + \alpha_{1,k}f_1(t_j) + \alpha_{2,k}f_2(t_j) + \varepsilon_{j,k} \quad (1)$$

where  $t_j$  are equidistant sampling points in  $[0, 1]$  with  $t_j = j/T$ ,  $\mu(t) = 1 + t + \exp\{-(t - 0.6)^2/0.05\}$  is the mean function,  $f_1(t) = \sqrt{2}\sin(2\pi t)$  and  $f_2(t) = \sqrt{2}\cos(2\pi t)$  are the principal component functions and  $\alpha_{1,k}$  and  $\alpha_{2,k}$  are principal component scores. The principal component scores are generated either (1) independently from a  $N(0, 36)$  and  $N(0, 9)$  distribution, respectively or (2) from a VAR(1)

process with

$$\Phi_1 = \begin{pmatrix} -0.5 & -0.2 \\ 0.2 & 0.5 \end{pmatrix}.$$

The error  $\varepsilon_{j,k}$  is generated from three different distributions as specified in Table (1), where the first one is a light-tailed distribution, the second one is heavy-tailed and the third one exhibits heteroscedasticity. The simulation is run 200 times with two different setups of sample sizes:  $T = 100$  data points per curve and  $N = 20$  curves and  $T = 150$  data points per curve and  $N = 50$  curves. We evaluate the estimates of the  $\tau = 0.05$  and  $\tau = 0.95$  expectile curves based on the mean squared error (MSE). The MSE of the  $k$ -th  $\tau$ -expectile curve is computed as

$$MSE_k = \frac{1}{T} \sum_{j=1}^T \{l_{\tau,k}(t_j) - \widehat{l}_{\tau,k}(t_j)\}^2, \quad (2)$$

where  $l_{\tau,k}(t)$  denotes the theoretical expectile and  $\widehat{l}_{\tau,k}(t)$  denotes the estimated expectile. Summary statistics of the mean squared errors and the average run time in seconds of the simulations are given in Table (1). The magnitude of the average MSE does not differ substantially between the independent and the autocorrelated case. This confirms that the quality of the proposed methodology is not sensitive to temporal dependence between functional observations. The methodology performs worst for the fat tailed distribution, but well handles heteroscedasticity. As a benchmark, we apply the methods proposed by Guo et al. (2015) and Tran et al. (2014) to the described simulation setup with independent functional observations. Guo et al. (2015) propose an estimation algorithm that jointly estimates a collection of generalized quantile curves. Tran et al. (2014) develop an analogue of PCA for generalized quantiles and propose three different estimation algorithms called BottomUp (BUP), TopDown (TD) and PrincipalExpectile (PEC) algorithm. For a detailed description of the algorithms we refer to their work. The simulation results of the four benchmark methods are given in Table (2). It can be seen that in terms

of average MSE our methodology outperforms the benchmark methods for almost all specifications. Only for the fat-tailed distribution in combination with the large sample size ( $T = 150, N = 50$ ) the method proposed by Guo et al. (2015) performs slightly better.

|                                    |      | $T = 100, N = 20$ |        | $T = 150, N = 50$ |         |
|------------------------------------|------|-------------------|--------|-------------------|---------|
|                                    |      | (1)               | (2)    | (1)               | (2)     |
| $\tau = 0.05$                      |      |                   |        |                   |         |
| $\varepsilon \sim N(0, 0.5)$       | Mean | 0.0433            | 0.0407 | 0.0259            | 0.0234  |
|                                    | SD   | 0.0285            | 0.0281 | 0.0177            | 0.0168  |
|                                    | AT   | 3.3900            | 3.7200 | 9.8000            | 10.3200 |
| $\varepsilon \sim t(5)$            | Mean | 0.2447            | 0.2242 | 0.1480            | 0.1401  |
|                                    | SD   | 0.2508            | 0.2407 | 0.1644            | 0.1571  |
|                                    | AT   | 3.7100            | 4.6600 | 11.6200           | 12.0700 |
| $\varepsilon \sim N(0, \mu(t)0.5)$ | Mean | 0.0521            | 0.0518 | 0.0499            | 0.0501  |
|                                    | SD   | 0.0379            | 0.0354 | 0.0385            | 0.0393  |
|                                    | AT   | 3.2600            | 3.7700 | 9.8700            | 12.2000 |
| $\tau = 0.95$                      |      |                   |        |                   |         |
| $\varepsilon \sim N(0, 0.5)$       | Mean | 0.0448            | 0.0400 | 0.0254            | 0.0233  |
|                                    | SD   | 0.0295            | 0.0271 | 0.0174            | 0.0170  |
|                                    | AT   | 3.4400            | 3.7200 | 10.1300           | 11.0100 |
| $\varepsilon \sim t(5)$            | Mean | 0.2444            | 0.2290 | 0.1465            | 0.1428  |
|                                    | SD   | 0.2565            | 0.2396 | 0.1590            | 0.1729  |
|                                    | AT   | 3.7500            | 4.2300 | 10.3700           | 12.2500 |
| $\varepsilon \sim N(0, \mu(t)0.5)$ | Mean | 0.0564            | 0.0518 | 0.0416            | 0.0500  |
|                                    | SD   | 0.0381            | 0.0340 | 0.0286            | 0.0389  |
|                                    | AT   | 3.5100            | 3.8200 | 10.2100           | 11.8000 |

Table 1: Mean and standard deviation (SD) of MSE and average run time in seconds (AT) based on 200 simulation runs for independent PC scores (1) and autocorrelated PC scores (2).

|                                    |      | $T = 100, N = 20$ |        |        | $T = 150, N = 50$ |        |        |        |        |
|------------------------------------|------|-------------------|--------|--------|-------------------|--------|--------|--------|--------|
|                                    |      | Guo               | BUP    | TD     | PEC               | Guo    | BUP    | TD     | PEC    |
| $\varepsilon \sim N(0, 0.5)$       | Mean | 0.5800            | 0.3921 | 0.1566 | $\tau = 0.05$     | 0.1313 | 0.0749 | 0.2290 | 0.0704 |
|                                    | SD   | 2.2901            | 0.2371 | 0.0121 |                   | 0.0156 | 0.4637 | 0.1887 | 0.0039 |
| $\varepsilon \sim t(5)$            | Mean | 0.4513            | 1.1577 | 0.7842 | $\tau = 0.05$     | 0.3735 | 0.0993 | 0.5780 | 0.4379 |
|                                    | SD   | 1.4959            | 0.5303 | 0.1575 |                   | 0.0664 | 0.3444 | 0.2064 | 0.0911 |
| $\varepsilon \sim N(0, \mu(t)0.5)$ | Mean | 0.5308            | 0.6576 | 0.2968 | $\tau = 0.95$     | 0.2292 | 0.0923 | 0.3241 | 0.1336 |
|                                    | SD   | 1.7210            | 0.4211 | 0.0241 |                   | 0.0337 | 0.3376 | 0.2894 | 0.0075 |
| $\varepsilon \sim N(0, 0.5)$       | Mean | 0.4753            | 0.3833 | 0.1567 | $\tau = 0.95$     | 0.1343 | 0.0760 | 0.2316 | 0.0707 |
|                                    | SD   | 1.8573            | 0.2143 | 0.0129 |                   | 0.0197 | 0.4298 | 0.1956 | 0.0043 |
| $\varepsilon \sim t(5)$            | Mean | 0.5104            | 1.1637 | 0.7643 | $\tau = 0.95$     | 0.3785 | 0.0988 | 0.5998 | 0.4408 |
|                                    | SD   | 1.6699            | 0.5796 | 0.1135 |                   | 0.0653 | 0.3294 | 0.4100 | 0.0835 |
| $\varepsilon \sim N(0, \mu(t)0.5)$ | Mean | 0.5260            | 0.7514 | 0.3713 | $\tau = 0.95$     | 0.2806 | 0.0879 | 0.3247 | 0.1341 |
|                                    | SD   | 1.6950            | 1.1349 | 1.0524 |                   | 0.0378 | 0.3207 | 0.2617 | 0.0087 |

Table 2: Mean and standard deviation (SD) of MSE based on 200 simulation runs for independent PC scores with four different benchmark methods.

## References

- Guo, M., Zhou, L., Härdle, W. K., and Huang, J. Z. (2015), “Functional Data Analysis of Generalized Regression Quantiles,” *Statistics and Computing*, 25, 189–202.
- Tran, N. M., Osipenko, M., and Härdle, W. K. (2014), “Principal Component Analysis in an Asymmetric Norm,” *Humboldt University Berlin, CRC 649 Discussion Paper*.
